# Supplementary material for: A minimal benzo[c][1,2,5]thiadiazole-based electron acceptor as a third component material for ternary polymer solar cells with efficiencies exceeding 16.0%
Source: Royal Society of Chemistry journal article supplement (doi:10.1039/c9mh00993k), 2019-07-29
Supplement: c9mh00993k1.pdf [file c9mh00993k1.pdf]

## Electronic Supplementary Information

### **A Minimal Benzo[c][1,2,5]thiadiazole-Based Electron Acceptor as a Third Component Material for Ternary Polymer Solar Cells with Efficiencies Exceeding 16.0%**

Yunlong Ma,<sup>a</sup> Xiaobo Zhou,<sup>b</sup> Dongdong Cai,<sup>a</sup> Qisheng Tu,<sup>ac</sup> Wei Ma,<sup>b</sup> and Qingdong Zheng<sup>\*a</sup>

<sup>a</sup>State Key Laboratory of Structural Chemistry, Fujian Institute of Research on the Structure of Matter, Chinese Academy of Sciences, 155 Yangqiao West Road, Fuzhou, Fujian 350002, China.

<sup>b</sup>State Key Laboratory for Mechanical Behavior of Materials, Xi'an Jiaotong University, Xi'an, Shaanxi 710049, China.

<sup>c</sup>University of Chinese Academy of Sciences, 19 Yuquan Road, Beijing 100049, China.

E-mail address: [qingdongzheng@fjirsm.ac.cn](mailto:qingdongzheng@fjirsm.ac.cn).

#### **Materials**

4,7-Bis(5-bromothiophen-2-yl)-5,6-difluorobenzo[c][1,2,5]thiadiazole, J71, ITIC, PM6, Y6 and other materials for this work were purchased from Sigma-Aldrich, Alfa Aesar chemical company, Adamas-beta Ltd., Derthon Optoelectronic Materials Science & Technology Co. Ltd, and eFlexPV limited. Unless otherwise specified, these materials and chemicals were used without any further purification.

#### **General characterization**

UV-vis absorption spectra were measured using a Lambda 35 UV/vis spectrophotometer. Photoluminescence spectra were obtained on a Cary spectrophotometer. Time-resolved photoluminescence (TR-PL) measurements were carried out on an FLS980 fluorescence spectrophotometer. DSC measurements were

carried out on DTA404PC. Surface morphology of the active layers was analyzed using a dimension icon AFM in tapping mode. TEM images of the active layers were obtained by a F20 Tecnai instrument operated at an acceleration voltage of 200 kV. Cyclic voltammetry measurements were carried out by using an electrochemical workstation (CHI 604E) in acetonitrile solution with 0.1 M tetrabutylammonium hexafluorophosphate as the supporting electrolyte. Pt plate, Pt wire and Ag/AgNO<sub>3</sub> were applied as the working electrode, counter electrode and reference electrode, respectively. HOMO/LUMO energy levels were calculated by using the equation of  $E_{HOMO/LUMO} = - (4.82 + \varphi_{ox}/\varphi_{red})$  eV.

### **Grazing incidence wide angle X-ray scattering (GIWAXS) characterization**

GIWAXS measurements were performed at beamline 7.3.3 at the Advanced Light Source. Samples were prepared on Si substrates using identical blend solutions as those used in devices. The 10 keV X-ray beam was incident at a grazing angle of 0.12°-0.16°, selected to maximize the scattering intensity from the samples. The scattered x-rays were detected using a Dectris Pilatus 2M photon counting detector.

### **Fabrication of inverted PSCs**

Indium tin oxide (ITO) glass (sheet resistance = 15 Ω sq<sup>-1</sup>) was cleaned by sequentially ultrasonicated in detergent, deionized water, acetone, and isopropanol for 15 min each and then drying in an oven at 80 °C overnight. The pre-cleaned ITO glasses were UV-cleaned in a UV-ozone chamber for 15 min at room temperature. The ZnO electron transport layers were prepared on the ITO substrate according to previous reported procedures.<sup>1</sup> A chloroform solution that had a fixed J71:ITIC ratio of 1:1 (w/w) at various BTF loadings was spin-coated (3000 r min<sup>-1</sup>) on the ZnO layer to form a photoactive layer (ca. 130 nm). The concentration of the ternary blend solution is 6 mg/mL for J71. At last, 10 nm of MoO<sub>3</sub> and 100 nm of Ag were deposited onto the photoactive layer through shadow masks by thermal evaporation. The active area of the devices was 4 mm<sup>2</sup>. The devices were tested in the glove-box with any encapsulation.

### **Fabrication of conventional PSCs**

The conventional devices were fabricated by using poly(3,4-ethylenedioxythiophene):poly(styrenesulfonate) (PEDOT:PSS) as the hole transport

layer. After oxygen plasma treatment for 4 min, a PEDOT:PSS layer was prepared on the substrates through spin coating at 3500 rpm. Then the PEDOT:PSS substrates were immediately baked at 150 °C in air for 10 min. The PM6:Y6 (1:1.2) blends with and without 10 wt% BTF in donor were fully dissolved in chloroform with a polymer concentration of 6 mg/mL. Before the spin-coating, 1-chloronaphthalene (0.5% volume) was used to optimize the blend film morphology. The mixed solutions were spin-coated onto the PEDOT:PSS-covered substrates at 3500 rpm for 30 s and annealed at 85 °C for 5 min to prepare the active layers. Then the PDIN solution was spin-coated onto the active layers at 2000 rpm for 30 s. Finally, ~100 nm of Ag was deposited on the top of the PDIN layer through shadow masks by thermal evaporation.

### **Characterization of PSCs**

The devices were measured under AM 1.5 G irradiation (100 mW·cm<sup>-2</sup>) with an Oriel sol3A simulator (Newport). *J-V* measurements were carried out using a Keithley 2400 source meter. The light intensity for *J-V* measurements was calibrated with a NREL-certified silicon reference cell. EQE data was taken using the QE/IPCE measurement kit (QE-PV-SI) from Newport.

### **Hole- or electron-only devices fabrication and characterization**

Hole- and electron-only devices were fabricated similar to the typical fabrication condition of ternary devices with device structures of ITO/PEDOT:PSS/active layer/Au and ITO /ZnO/active layer/Ca/Al, respectively. The thickness of the film was measured by a Bruker Dektak XT surface profilometer. The *J-V* characterization of the devices was measured by using a computer controlled Keithley 2440 source meter. The SCLC mobilities were calculated by MOTT-Gurney equation<sup>2,3</sup>:

$$J = \frac{9}{8} \varepsilon_r \varepsilon_0 \mu \frac{V^2}{L^3}$$

Where  $\varepsilon_r$  is the relative dielectric constant of the active layer material (assumed to be 3),  $\mu$  is the hole or electron mobility,  $\varepsilon_0$  is the permittivity of empty space (8.85×10<sup>-12</sup> F m<sup>-1</sup>),  $L$  is the film thickness of the active layer,  $V$  is the internal voltage in the device, and  $V = V_{\text{appl}} - V_{\text{bi}}$ , where  $V_{\text{appl}}$  is the applied voltage to the device, and  $V_{\text{bi}}$  is the built-in voltage due to the relative work function difference between the two electrodes (in

the hole- and electron-only devices, the  $V_{bi}$  values are 0.2 and 0.7 V, respectively),<sup>4,5</sup> and  $J$  is the current density ( $A m^{-2}$ ). The hole or electron mobility can be calculated from the slope of the  $J^{1/2}$ - $V$  curves.

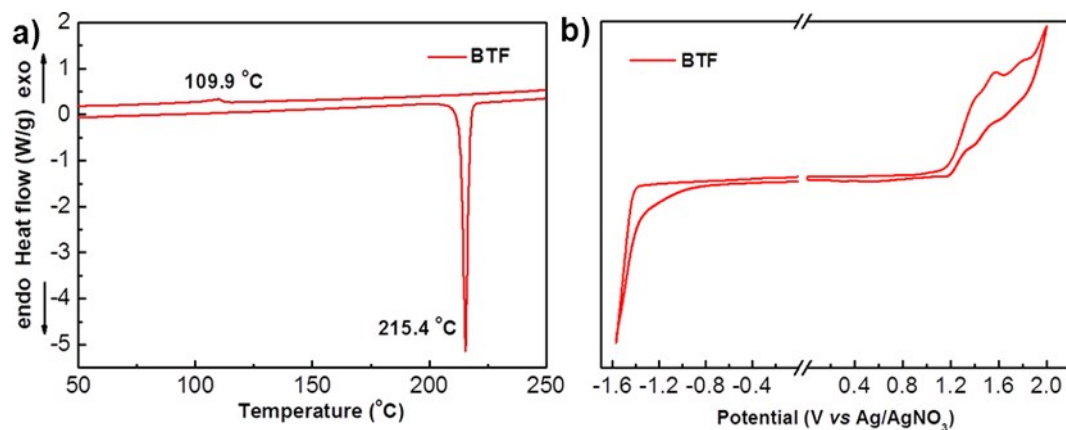

**Fig. S1.** a) DSC thermogram and b) cyclic voltammogram for BTF.

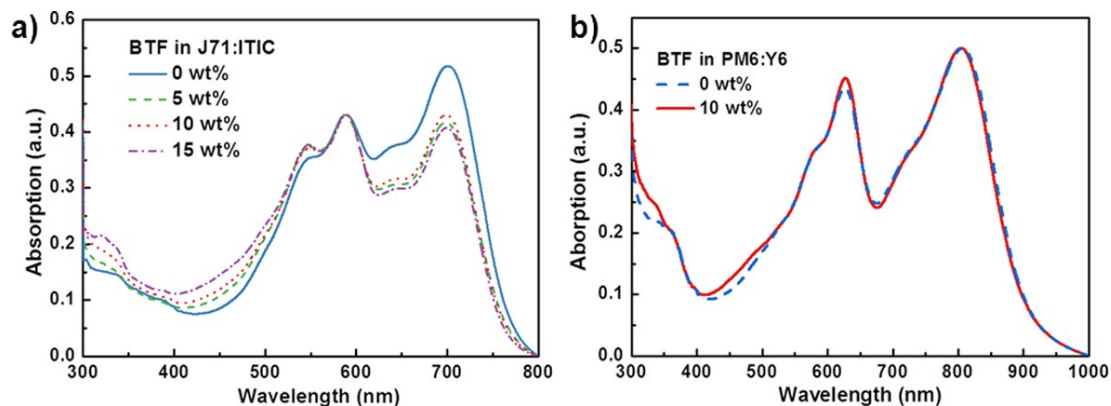

**Fig. S2** a) Absorption spectra for J71:ITIC:BTF ternary films with various amounts of BTF; b) absorption spectra for PM6:Y6 blends with and without 10 wt% BTF.

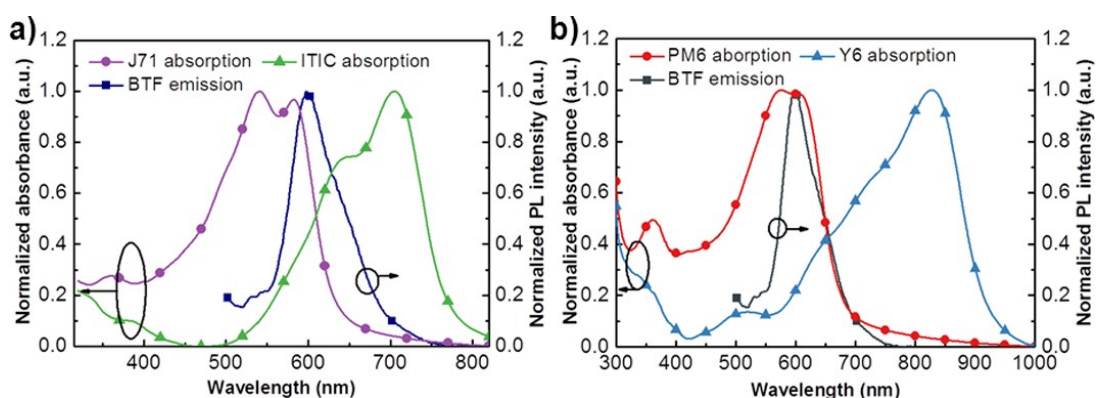

**Fig. S3** a) Normalized UV-Vis absorption spectra for J71 and ITIC, and the normalized PL spectrum for BTF film under 460 nm light excitation; b) normalized UV-Vis absorption spectra of PM6 and Y6, and the normalized PL spectrum of BTF film under 460 nm light excitation.

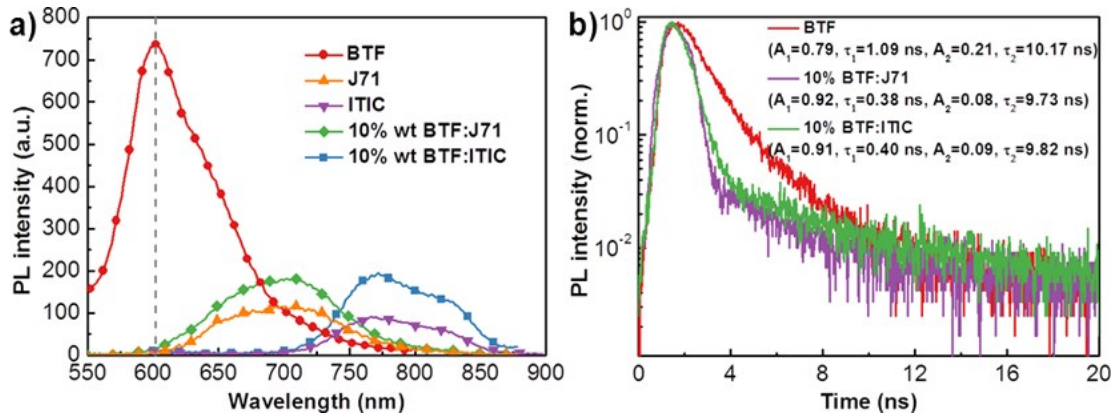

**Fig. S4** a) PL spectra for the J71, ITIC, and BTF neat films, and 10wt% J71:BTF film and 10 wt% J71:ITIC film; b) TPL spectra for BTF neat films, 10wt% J71:BTF film and 10 wt% J71:ITIC film.

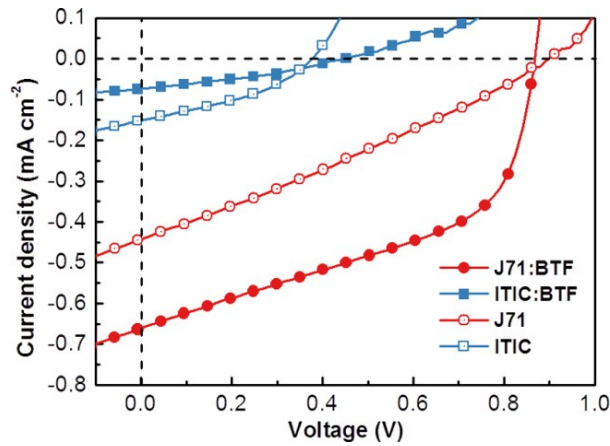

**Fig. S5**  $J$ - $V$  curves for the devices based on J71, ITIC, J71:BTF, and ITIC:BTF films.

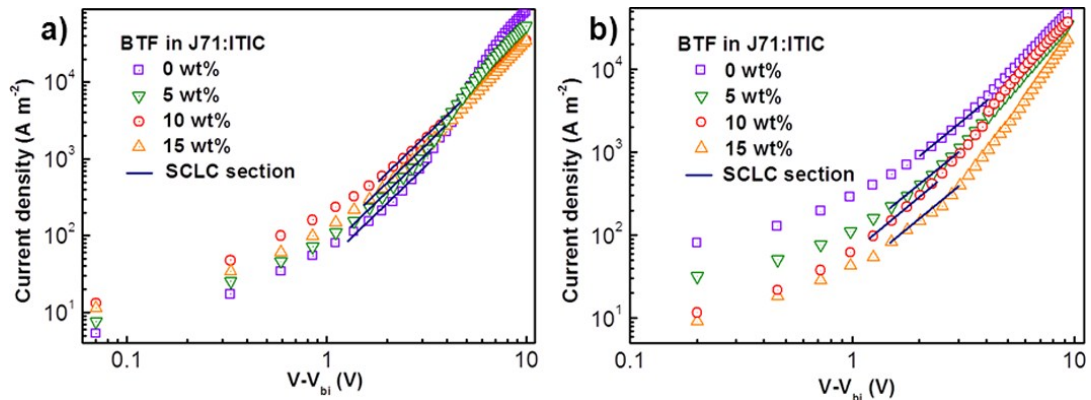

**Fig. S6** a)  $J$ - $V$  curves for the hole-only and b) electron-only of ternary devices with BTF concentrations ranged from 0 to 15 wt%.



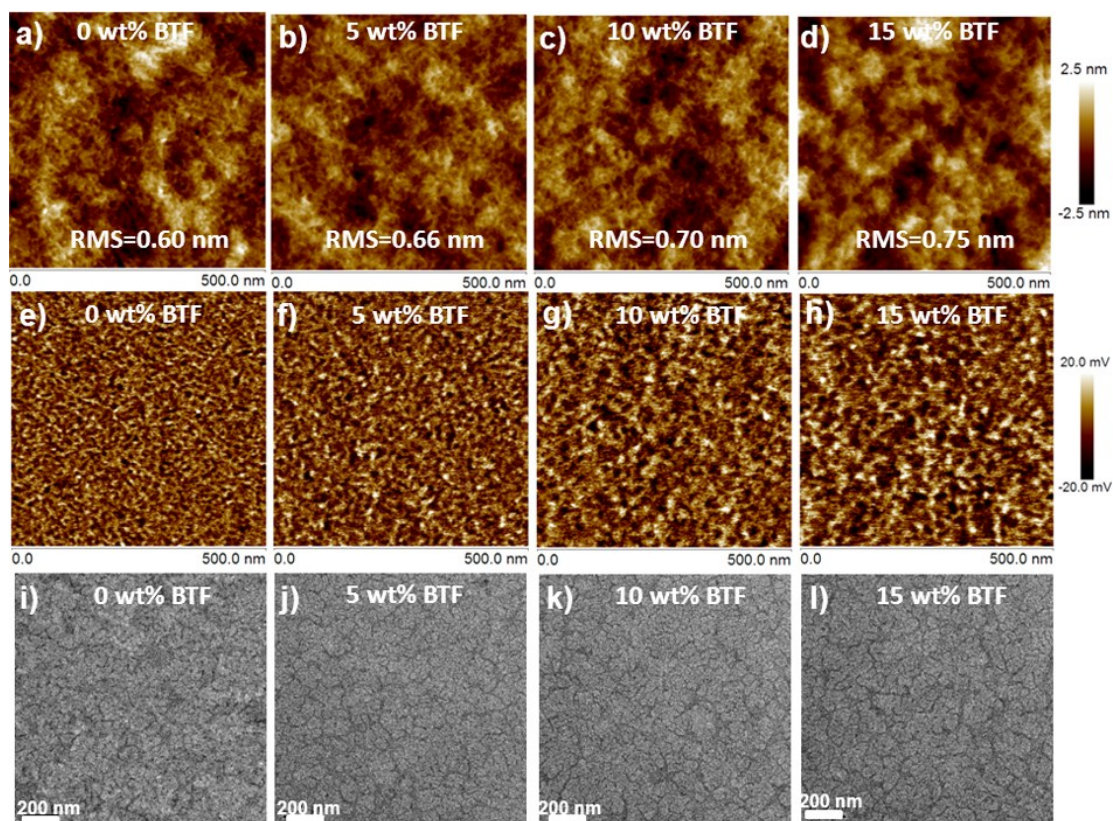

**Fig. S7** a-d) AFM topography, e-h) phase, and i-l) TEM images of ternary blends with different BTF contents.

**Table S1** Hole and electron mobilities for J71:ITIC:BTF-based devices with different weight percentages of BTF measured by the SCLC method

| BTF loading (wt%) | $\mu_h$ ( $\text{cm}^2 \text{V}^{-1} \text{s}^{-1}$ ) | $\mu_e$ ( $\text{cm}^2 \text{V}^{-1} \text{s}^{-1}$ ) | $\mu_e/\mu_h$ |
|-------------------|-------------------------------------------------------|-------------------------------------------------------|---------------|
| 0                 | $1.10 \times 10^{-4}$ ( $1.04 \pm 0.06$ )             | $2.20 \times 10^{-4}$ ( $2.12 \pm 0.09$ )             | 2.00          |
| 5                 | $1.21 \times 10^{-4}$ ( $1.18 \pm 0.07$ )             | $1.97 \times 10^{-4}$ ( $1.85 \pm 0.08$ )             | 1.63          |
| 10                | $1.40 \times 10^{-4}$ ( $1.36 \pm 0.05$ )             | $1.39 \times 10^{-4}$ ( $1.36 \pm 0.06$ )             | 0.99          |
| 15                | $1.26 \times 10^{-4}$ ( $1.23 \pm 0.06$ )             | $1.18 \times 10^{-4}$ ( $1.10 \pm 0.07$ )             | 0.94          |

**Table S2** Summarized parameters of the ordered structures

| BTF loading<br>(wt%) | $\pi$ - $\pi$ stacking                  |                                         | Lamellar stacking                       |                                   |
|----------------------|-----------------------------------------|-----------------------------------------|-----------------------------------------|-----------------------------------|
|                      | d-spacing ( $\text{\AA}$ ) <sup>a</sup> | CL ( $\text{\AA}$ ) (FWHM) <sup>b</sup> | d-spacing ( $\text{\AA}$ ) <sup>c</sup> | CL ( $\text{\AA}$ ) (FWHM)        |
| 0%                   | 3.681                                   | 20.583 (0.275 $\text{\AA}^{-1}$ )       | 20.990                                  | 67.344 (0.084 $\text{\AA}^{-1}$ ) |
| 5%                   | 3.624                                   | 20.759 (0.272 $\text{\AA}^{-1}$ )       | 20.935                                  | 71.136 (0.079 $\text{\AA}^{-1}$ ) |
| 10%                  | 3.621                                   | 21.563 (0.262 $\text{\AA}^{-1}$ )       | 21.033                                  | 75.537 (0.075 $\text{\AA}^{-1}$ ) |
| 15%                  | 3.633                                   | 21.796 (0.259 $\text{\AA}^{-1}$ )       | 21.289                                  | 82.979 (0.068 $\text{\AA}^{-1}$ ) |

<sup>a</sup>(010) Diffraction peak along the  $q_z$  axis; <sup>b</sup>Coherent length (CL) estimated from the Scherrer equation ( $CCL=2\pi k/\text{FWHM}$ ), in which  $k$  is the Scherrer factor and FWHM is the full-width at the half-maximum of the peak; <sup>c</sup>(100) Diffraction peak along the  $q_{xy}$  axis.

**Table S3** Photovoltaic parameters for J71:ITIC:BTF-based devices under different annealing temperatures

| Annealing temperatures ( $^{\circ}\text{C}$ ) | $V_{oc}$ (V) | $J_{sc}$ ( $\text{mA cm}^{-2}$ ) | FF (%) | PCE (%) <sup>a</sup>     |
|-----------------------------------------------|--------------|----------------------------------|--------|--------------------------|
| 90                                            | 0.960        | 17.02                            | 68.42  | 11.18 (11.99 $\pm$ 0.26) |
| 100                                           | 0.956        | 17.43                            | 69.06  | 11.51 (11.12 $\pm$ 0.46) |
| 110                                           | 0.952        | 18.48                            | 70.03  | 12.35 (12.14 $\pm$ 0.22) |
| 120                                           | 0.946        | 17.42                            | 69.14  | 11.39 (11.11 $\pm$ 0.36) |

<sup>a</sup> In parentheses are average PCEs from 8 devices.

**Table S4** Photovoltaic parameters for PM6:Y6:BTF-based devices under different annealing temperatures

| Annealing temperatures ( $^{\circ}\text{C}$ ) | $V_{oc}$ (V) | $J_{sc}$ ( $\text{mA cm}^{-2}$ ) | FF (%) | PCE (%) <sup>a</sup>     |
|-----------------------------------------------|--------------|----------------------------------|--------|--------------------------|
| 80                                            | 0.855        | 25.88                            | 73.77  | 16.32 (16.04 $\pm$ 0.33) |
| 85                                            | 0.853        | 26.11                            | 74.22  | 16.53 (16.15 $\pm$ 0.36) |
| 90                                            | 0.850        | 26.05                            | 73.03  | 16.16 (15.89 $\pm$ 0.29) |
| 100                                           | 0.846        | 25.94                            | 72.22  | 15.85 (15.71 $\pm$ 0.16) |

<sup>a</sup> In parentheses are average PCEs from 8 devices.

## References

- [S1] Z. Yin, Q. Zheng, S.-C. Chen and D. Cai, *ACS Appl. Mater. Interfaces*, 2013, **5**, 9015-9025.
- [S2] P. W. M. Blom, M. J. M. de Jong and M. G. van Munster, *Phys. Rev. B*, 1997, **55**, R656-R659.
- [S3] G. G. Malliaras, J. R. Salem, P. J. Brock and C. Scott, *Phys. Rev. B*, 1998, **58**, R13411-R13414.
- [S4] X. Guo, N. Zhou, S. J. Lou, J. Smith, D. B. Tice, J. W. Hennek, R. P. Ortiz, J. T. L. Navarrete, S. Li, J. Strzalka, L. X. Chen, R. P. H. Chang, A. Facchetti and T. J. Marks, *Nat. Photonics*, 2013, **7**, 825-833.
- [S5] H. Bin, L. Gao, Z.-G. Zhang, Y. Yang, Y. Zhang, C. Zhang, S. Chen, L. Xue, C. Yang, M. Xiao and Y. Li, *Nat. Commun.*, 2016, **7**, 13651.
